# Supplementary material for: Economically detaching transparent and flexible (Al,Ga)N nanowire films with improved photoelectric response in view of ultraviolet photodetectors
Source: Royal Society of Chemistry journal article supplement (doi:10.1039/d0ma00943a), 2021-01-01
Supplement: d0ma00943a1.pdf [file d0ma00943a1.pdf]

## Supporting Information

# Economically Detaching Transparent and Flexible (Al,Ga)N Nanowire Films with Improved Photoelectric Response in view of Ultraviolet Photodetectors

Zhiwei Xing<sup>a,b</sup>, Yukun Zhao<sup>a\*</sup>, Lifeng Bian<sup>a</sup>, Jianya Zhang<sup>a,b</sup>, Min Zhou<sup>a,b</sup>,  
Wenxian Yang<sup>a</sup>, Yuanyuan Wu<sup>a</sup>, Min Jiang<sup>a,b</sup>, Junhua Long<sup>a,b</sup>, Shulong Lu<sup>a,b</sup>

<sup>a</sup> Suzhou Institute of Nano-Tech and Nano-Bionics (SINANO), Chinese Academy of Sciences  
(CAS), 215123 Suzhou, China

<sup>b</sup> School of Nano-Tech and Nano-Bionics, University of Science and Technology of China, 230026  
Hefei, China

\*Corresponding Author: [ykzhao2017@sinano.ac.cn](mailto:ykzhao2017@sinano.ac.cn)

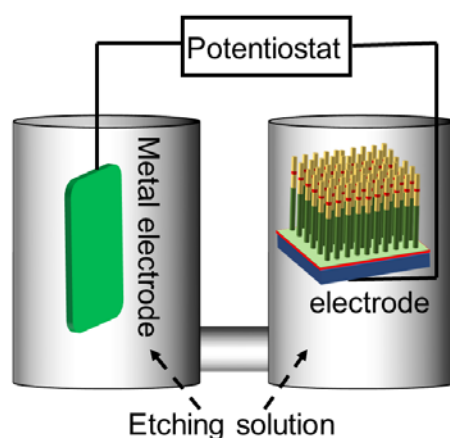

Fig. S1 Schematic illustration of the experimental setup for electrochemical etching.

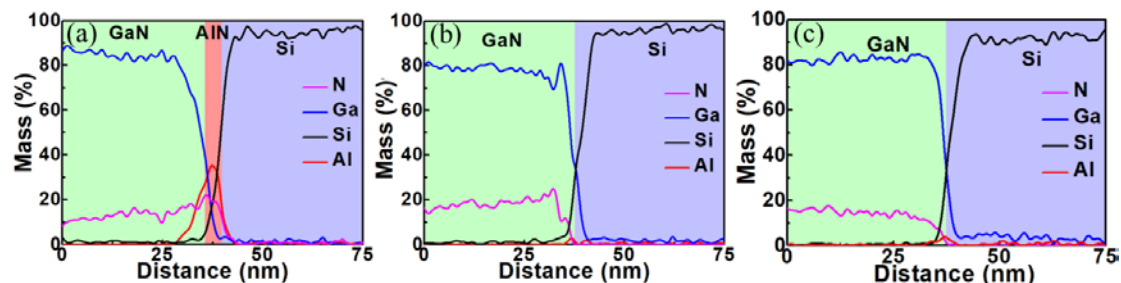

Fig. S2 EDX spectra revealing the element distributions along the interface layers from the NWs to substrates for (a) sample A, (b) sample B (on a foreign Si) and (c) sample C (on a foreign Si).

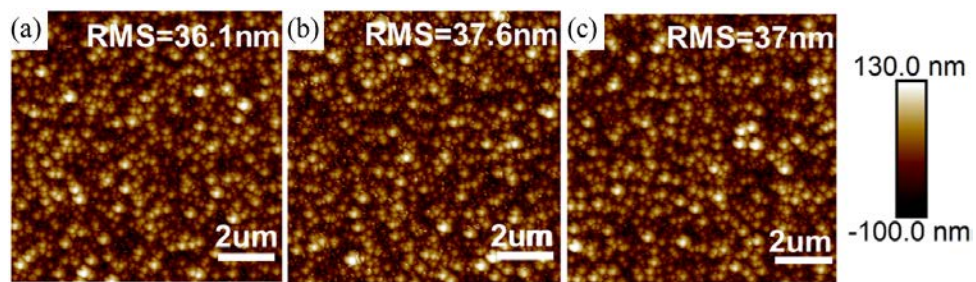

Fig. S3 AFM images of the top NWs of (a) sample A, (b) sample B (on a foreign Si) and (c) sample C (on a foreign Si).
